# Supplementary material
Source: MDPI journal article supplement (https://www.mdpi.com/2073-4395/11/11/2346)
Supplement: s1 [file s1]

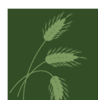

# Effect of Spatial-Temporal Light Competition on Cotton Yield and Yield Distribution

Supplemental Table S1. English abbreviation table.

| English Abbreviation | English Full Name                   |
|----------------------|-------------------------------------|
| PAR                  | Photosynthetically active radiation |
| iPAR                 | PAR interception                    |
| DAE                  | Days after emergence                |
| LAI                  | Leaf area index                     |

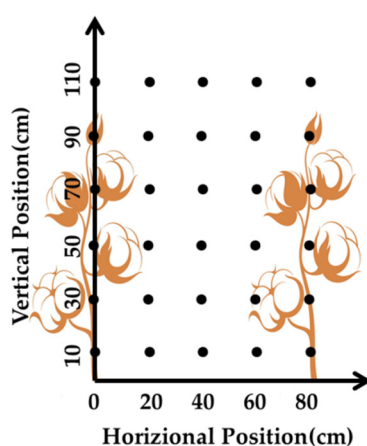

Supplemental Figure S1. Measurement point between the two lines of cotton.

$$tPAR = \text{transmitted PAR intensity} / \text{incident PAR intensity} \quad (1)$$

$$rPAR = \text{reflected PAR intensity} / \text{incident PAR intensity} \quad (2)$$

$$\begin{aligned} iPAR &= (\text{incident PAR total intensity} - \text{transmitted PAR intensity} - \text{reflected PAR intensity}) / \text{incident PAR intensity} \\ &= 1 - tPAR - rPAR \end{aligned} \quad (3)$$

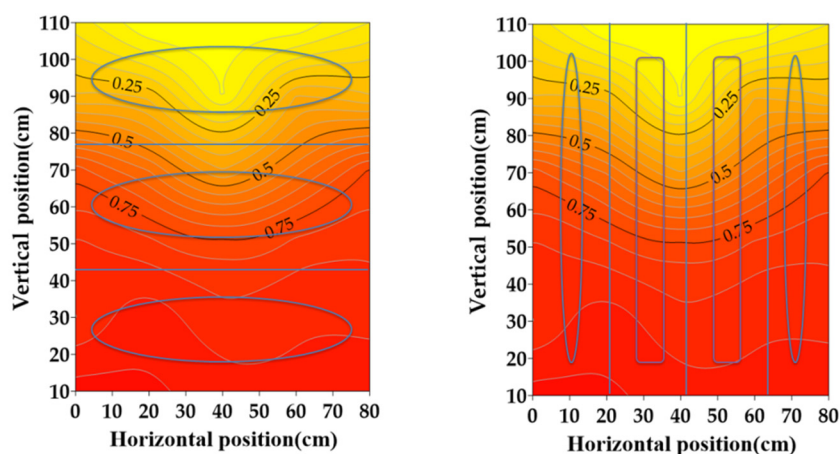

**Supplemental Figure S2.** The spatial distribution of the interception of PAR in the different section.

$$t_0 = \frac{\ln b}{k} \quad (t_0 = t) \quad (4)$$

$$t_1 = \frac{\ln b - \ln(2 + \sqrt{3})}{k} \quad (5)$$

$$t_2 = \frac{\ln b + \ln(2 + \sqrt{3})}{k} \quad (6)$$

$$V_M = \frac{Ak}{4} \quad (7)$$

$$\Delta t = t_2 - t_1 \quad (8)$$

$$V_A = \frac{Y_2 - Y_1}{\Delta t} \quad (9)$$

In the formula,  $V_M$  is the maximum rate of biomass accumulation,  $t$  (d) is the maximum period of rapid biomass accumulation,  $Y_1$  and  $Y_2$  are the biomass at  $t_1$  and  $t_2$ , respectively, and  $\Delta t$  is the total period of average biomass accumulation.

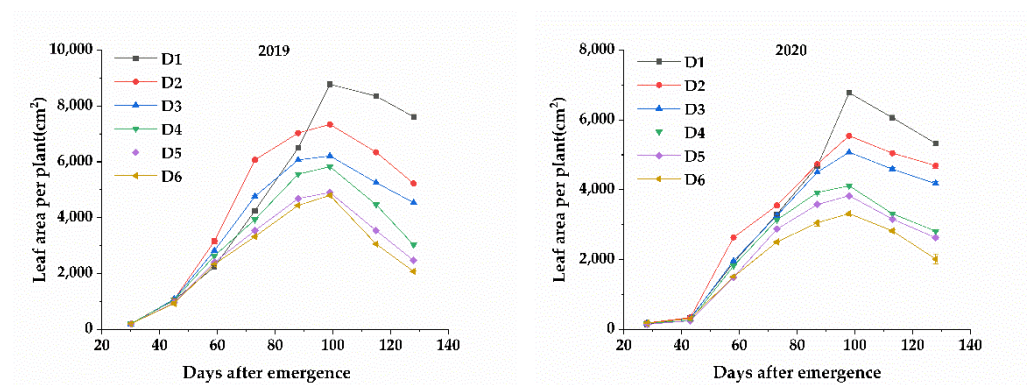

**Supplemental Figure S3.** Leaf area per cotton plant growing at different planting densities in 2019 and 2020.

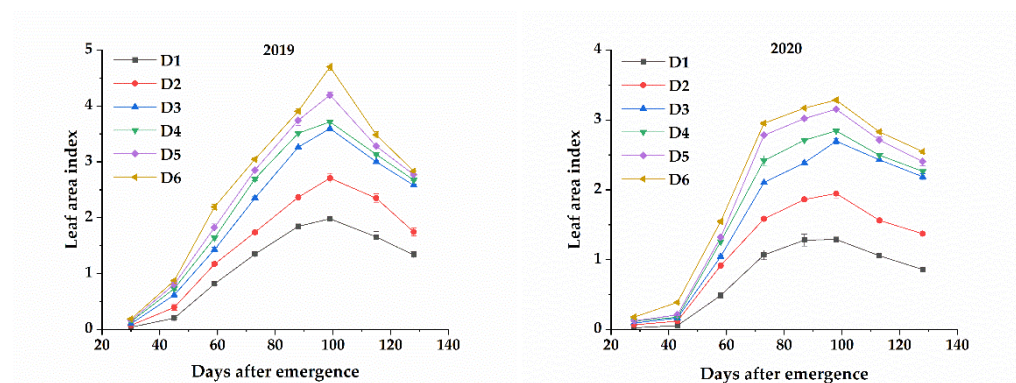

**Supplemental Figure S4.** Leaf area index of cotton plants growing at different planting densities in 2019 and 2020.

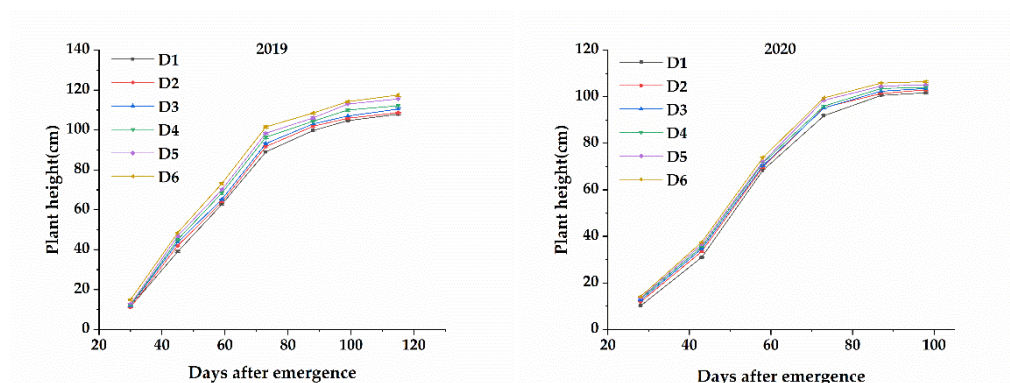

**Supplemental Figure S5.** Cotton plant height at different planting densities in 2019 and 2020.

**Supplemental Table S2.** Characteristic value of biomass accumulation in cotton growing season in 2019 and 2020.

| Treatment | A(kg·ha <sup>-1</sup> ) | t <sub>1</sub> (DAE) | t <sub>2</sub> (DAE) | Δt(d) | At DAE |
|-----------|-------------------------|----------------------|----------------------|-------|--------|
| Year 2019 |                         |                      |                      |       |        |
| D1        | 8051.792                | 65.9                 | 106.6                | 40.7  | 86.3   |
| D2        | 9106.212                | 61.4                 | 93.9                 | 32.5  | 77.7   |
| D3        | 10866.005               | 61.7                 | 100.1                | 38.5  | 80.9   |
| D4        | 11330.813               | 60.6                 | 99.2                 | 38.5  | 79.9   |
| D5        | 11951.848               | 59.2                 | 95.7                 | 36.5  | 77.5   |
| D6        | 13469.528               | 59.4                 | 98.7                 | 39.3  | 79.0   |
| Average   |                         | 61.4                 | 99.0                 | 37.7  | 80.2   |
| Year 2020 |                         |                      |                      |       |        |
| D1        | 5500.282                | 65.2                 | 96.6                 | 31.4  | 80.9   |
| D2        | 7451.035                | 61.5                 | 93.1                 | 31.7  | 77.3   |
| D3        | 8723.458                | 61.0                 | 95.3                 | 34.3  | 78.1   |
| D4        | 9635.201                | 61.1                 | 93.4                 | 32.3  | 77.2   |
| D5        | 10052.363               | 59.7                 | 91.9                 | 32.2  | 75.8   |
| D6        | 11629.892               | 60.5                 | 94.8                 | 34.3  | 77.7   |
| Average   |                         | 61.5                 | 94.2                 | 32.7  | 77.8   |

Note: A represents the theoretical maximum of aboveground biomass accumulation; t<sub>1</sub> represents the starting point and t<sub>2</sub> represents the ending point of the fast accumulation period; Δt represents the duration of t<sub>1</sub> to t<sub>2</sub>; DAE represents days after emergence.

**Supplemental Table S3.** Fitting equation of dry matter accumulation process in different density population from 2019 to 2020.

| Treatment | Regression Equation                  | R <sup>2</sup> |
|-----------|--------------------------------------|----------------|
| Year 2019 |                                      |                |
| D1        | $Y=8051.792/(1+265.178e^{-0.469t})$  | 0.997          |
| D2        | $Y=9106.212/(1+542.416e^{-0.081t})$  | 0.999          |
| D3        | $Y=10866.005/(1+254.255e^{-0.068t})$ | 0.999          |
| D4        | $Y=11330.813/(1+235.204e^{-0.068t})$ | 0.999          |
| D5        | $Y=11951.848/(1+267.615e^{-0.072t})$ | 0.999          |
| D6        | $Y=13469.528/(1+200.971e^{-0.067t})$ | 0.998          |
| Year 2020 |                                      |                |

|    |                                      |       |
|----|--------------------------------------|-------|
| D1 | $Y=5500.282/(1+880.114e^{-0.084t})$  | 0.999 |
| D2 | $Y=7451.035/(1+621.515e^{-0.083t})$  | 0.999 |
| D3 | $Y=8723.459/(1+405.124e^{-0.077t})$  | 0.998 |
| D4 | $Y=9635.201/(1+546.677e^{-0.082t})$  | 0.999 |
| D5 | $Y=10052.363/(1+495.999e^{-0.082t})$ | 0.999 |
| D6 | $Y=11629.892/(1+389.186e^{-0.077t})$ | 0.999 |

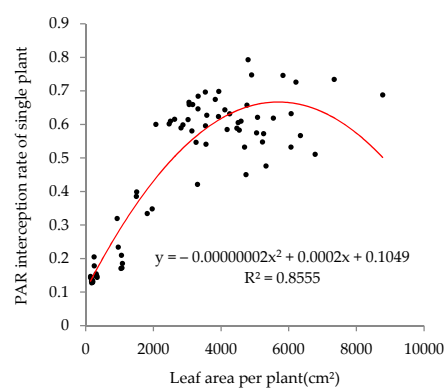

**Supplemental Figure S6.** Relationships and fitted models between iPAR per plant and leaf area per plant in 2019 and 2020.

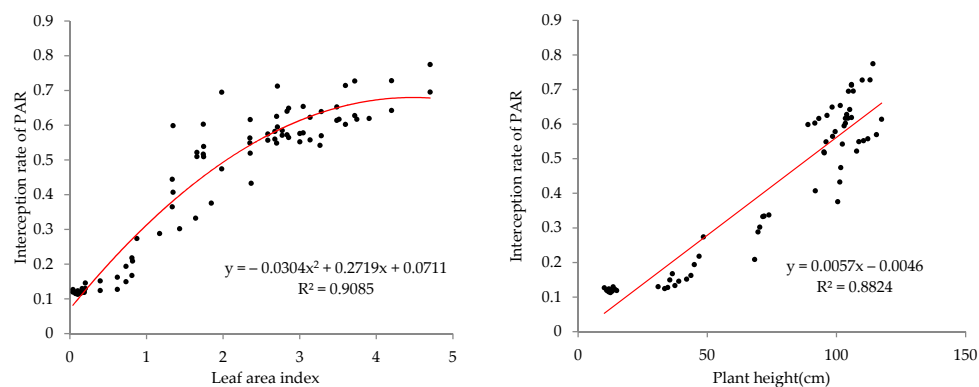

**Supplemental Figure S7.** Relationships and fitted models between the population iPAR and LAI, plant height in 2019 and 2020.
